# Supplementary material
Source: ML conference proceedings conference paper supplement (https://proceedings.mlr.press/v54/park17c.html)
Supplement: Supplementary file 1 [file park17c-supp.pdf]

# Supplementary Material

This supplementary material consists of two sections. The first section provides basic formulae for the MAP estimates under the mixture of Gaussians model; and the second section provides moment calculations for the Laplace and Gaussian mechanisms.

## 1 MAP estimates under the MoG models

For the maximum a posteriori estimate, we impose the Dirichlet prior on  $\pi \sim \text{Dir}(\alpha)$  and Normal-inverse-Wishart prior on  $p(\boldsymbol{\mu}_k, \Sigma_k) = \text{NIW}(\mathbf{0}, \kappa_0, \nu_0, S_0)$ , where the MAP estimates are

$$\begin{aligned}\pi_k^{MAP} &= \frac{N\pi_k^{MLE} + \alpha_k - 1}{N + \sum_k \alpha_k - K}, & \boldsymbol{\mu}_k^{MAP} &= \frac{N_k \boldsymbol{\mu}_k^{MLE}}{N_k + \kappa_0}, \\ \Sigma_k^{MAP} &= \frac{S_0 + N_k \Sigma_k^{MLE} + \frac{\kappa_0 N_k}{\kappa_0 + N_k} \boldsymbol{\mu}_k^{MLE} \boldsymbol{\mu}_k^{MLE\top}}{\nu_0 + N_k + d + 2}.\end{aligned}$$

In this paper we set hyperparameters to conventional values, e.g.  $\alpha = [2, 2, \dots, 2]$ ,  $\kappa_0 = 1$ ,  $\nu_0 = d + 2$ ,  $S_0 = \text{diag}(0.1, \dots, 0.1)$ , rather than optimizing them, cf. [1].

## 2 $\lambda$ -th Moment Calculations

### 2.1 Laplace Mechanism

**Univariate Laplace mechanism.** Suppose we use the univariate Laplace mechanism where the sensitivity is 1 and we add Laplace noise with parameter  $\frac{1}{\epsilon}$ . Then the privacy loss r.v. is:

$$\begin{aligned}Z &= \epsilon, & w.p. & \frac{1}{2} \\ &= -\epsilon, & w.p. & \frac{e^{-\epsilon}}{2} \\ &= \epsilon(1 - 2t), & \text{with density } & \frac{\epsilon}{2} e^{-\epsilon t}, 0 \leq t \leq 1\end{aligned}$$

This leads to the moment generating function:

$$\alpha_M(\lambda) = \mathbb{E}[e^{\lambda Z}] = \left(\frac{\lambda + 1}{2\lambda + 1}\right) e^{\lambda\epsilon} + \left(\frac{\lambda}{2\lambda + 1}\right) e^{-(\lambda+1)\epsilon}.$$

**Multivariate Laplace Mechanism with bounded  $L_1$  sensitivity** Suppose we use the  $d$ -variate Laplace mechanism where the  $L_1$ -sensitivity is equal to  $\Delta$ ; in this case, we add Laplace noise with parameter  $\Delta/\epsilon$  to each coordinate of the vector. Then the privacy loss random variable may be written as follows:

$$Z = \log \frac{e^{-\epsilon|t|_1/\Delta}}{e^{-\epsilon|\mu-t|_1/\Delta}} \quad w.p. \quad \frac{\epsilon^d}{\Delta^d 2^d} e^{-\epsilon|t|_1/\Delta},$$

which is the same as:

$$Z = \frac{\epsilon}{\Delta} (|\mu - t|_1 - |t|_1), \quad w.p. \quad \frac{\epsilon^d}{(2\Delta)^d} e^{-\epsilon|t|_1/\Delta}$$

Here  $\mu$  is the difference between  $f(D)$  and  $f(D')$  and has the property that  $|\mu|_1 \leq \Delta$ . Let  $\epsilon = \epsilon/\Delta$ . For a given  $\mu$ , this leads to the moment generating function:

$$\begin{aligned} \mathbb{E}[e^{\lambda Z}] &= (\epsilon/2)^d \int_{R^d} e^{\lambda\epsilon(|\mu-t|_1-|t|_1)} \times e^{-\epsilon|t|_1} dt \\ &= \left( \prod_j \frac{\epsilon}{2} \int_{-\infty}^{\infty} e^{\lambda\epsilon|\mu_j-t_j|-(\lambda+1)\epsilon|t_j|} dt_j \right) \\ &= \left( \prod_j \left( \frac{\lambda+1}{2\lambda+1} e^{\lambda\epsilon|\mu_j|} + \frac{\lambda}{2\lambda+1} e^{-(\lambda+1)\epsilon|\mu_j|} \right) \right) \end{aligned}$$

What we need is an upper bound on the functional  $\mathbb{E}[e^{\lambda Z}]$  for any  $\lambda$  over all  $\mu$  for which  $|\mu|_1 \leq \Delta$ . For positive  $\lambda$ , we note that the function  $\mathbb{E}[e^{\lambda Z}]$  is convex in  $|\mu|_j$ , and therefore the maximum value occurs when  $\mu = \Delta e_j$  where  $e_j$  is some coordinate vector. This maximum value is:

$$\frac{\lambda+1}{2\lambda+1} e^{\lambda\epsilon\Delta} + \frac{\lambda}{2\lambda+1} e^{-(\lambda+1)\epsilon\Delta}.$$

## 2.2 Multivariate Gaussian Mechanism

Suppose we use the  $d$ -variate Gaussian Mechanism where the  $L_2$ -sensitivity is 1 and we add multivariate spherical Gaussian noise  $N(0, \sigma^2 I_d)$ . Then, the privacy loss random variable can be written as follows:

$$Z = \frac{1 - 2x^\top \Delta}{2\sigma^2}, \quad w.p. \quad \frac{1}{\sigma(2\pi)^{d/2}} e^{-\|x\|^2/2\sigma^2}, \quad (1)$$

where  $\Delta$  is any  $d \times 1$  vector with unit norm. This in turn leads to the moment generating function:

$$\alpha_M(\lambda) = \mathbb{E}[e^{\lambda Z}] = e^{(\lambda+\lambda^2)/2\sigma^2}.$$

## References

- [1] C. M. Bishop. *Pattern recognition and machine learning*. Springer New York:, 2006.
